# Supplementary material
Source: HighWire-hosted journal article supplement (https://bmjopen.bmj.com/content/10/10/e033967)
Supplement: inline-supplementary-material-1 [file inline-supplementary-material-1.pdf]

**Determinants of citation in the literature on diesel exhaust exposure and lung cancer:  
a citation analysis**

**SUPPLEMENT**

**Text S1.** Protocol deviations.

**Text S2.** Search strategy and inclusion criteria.

**Text S3.** Data extraction.

**Text S4.** Dependent variable *citation*.

**Text S5.** References of included literature on the DEE – LC hypothesis.

**Table S1.** Top 5 of publications and authors within network.

**Table S2.** All characteristics of the publications in the network on the DEE – LC hypothesis.

**Table S3.** Odds ratios (95% CI's) for the likelihood of *empirical publications* to be cited by *reviews*.

**Table S4.** Sensitivity analyses on odds ratios (95% CI's) for the likelihood to be cited, without the four most cited publications.

**Table S5.** Explorative analysis on the association between source of funding and methodological quality indicators for empirical publications.

**Table S6.** Sensitivity analyses on the association between source of funding and study conclusion, adjusted for methodological quality indicators.

**Figure S1.** Development of citation bias over time.

### Text S1. Protocol deviations

The study methodology including the data-analysis plan was pre-registered in our study protocol of 7 June 2018 (<https://hdl.handle.net/10411/G8MPEI>). Deviations from this protocol are described below.

- Health outcome

We had planned to investigate the hypothesis Diesel Exhaust Exposure – Bladder Cancer, but that network would have been too small for a proper citation analysis. We had also planned to expand our network by including publications on lung cancer as well. However, this would result in two overlapping subnetworks, with sometimes contradicting study outcomes (e.g. supportive for bladder cancer but non-supportive for lung cancer). This would be potentially confusing, therefore we decided to focus only on the lung cancer outcome.

- Abstract reporting

Consequently, we no longer needed to score *abstract reporting* in the data-extraction phase of the study. Lung cancer is always or almost always reported in the abstract, so there would be hardly any variation in this variable, and we cannot use it as a potential determinant of citation in our analyses.

- Check on matching algorithm for ‘exotic’ names

The first author names in four publications were spelled in different ways (references 60, 61, 66 and 93 in Text S5). The matching algorithm depends on the name of the first author. We manually checked the reference lists of all the (later) publications to see if these four publications had been cited (in whatever spelling format), and checked if this was coded correctly in our dataset. That turned out to be the case, despite the variation in spelling.

- Empty reference lists

Two publications (references 24 and 70 in Text S5) had empty reference lists in Web of Science Core Collection, while the publications did have reference lists. We checked these references and corrected for this omission by adding the following lines to the Stata syntax:

```
replace citation = 1 if (authorciting == "emmelin" & yearciting == 1993) &  
( (authorcited == "garshick" & yearcited == 1988) | (authorcited ==  
"gustavsson" & yearcited== 1990) )
```

```
replace citation = 1 if (authorciting == "pflugler" & yearciting == 1994) &  
( (authorcited == "boffetta" & yearcited == 1988) | (authorcited ==  
"boffetta" & yearcited== 1990) )
```

- Citing bias

The analysis on citing bias was not performed, due to lack of resources, the small number of systematic reviews, and our earlier experience that the results were difficult to interpret.

- Study outcome / conclusion

We did not score the statistical significance and direction of the study outcome. We decided this because of the large number of analyses that turned out to have been performed in many of the studies, on sub-groups, with or without latency time, and with several dose-response relationships. It was difficult to summarise all these analysis results in one variable, and it would have led to difficulties in the interpretation as well. Instead, we focused only on the study conclusion. See Text S3 for more information.

- Methodological quality indicators

There was a huge variation in study quality of the empirical publications in this network. Each of these methodological quality indicators could provide a justified reason to cite one publication over the other. Therefore, we tried to measure these quality indicators as completely as possible, and to adjust for them in the sub-network analyses.

- Sub-network analyses

We skipped the citation analysis on the full network adjusted for study design (as proxy for quality). Instead, we analysed how empirical reviews are cited by any other type of publication, both crude and adjusted. This latter type of analysis allows to adjust for the *all the* quality indicators (including sample size, type of assessment, type of diesel and smoking adjustment). This would not be possible in the main analysis, as the latter indicators could only be defined for empirical publications.

- Concordance analyses

Concordance analyses are not reported in the main text to improve its readability. They are instead reported in here:

Where applicable, we calculated whether the cited and the citing publications had the same characteristics (*concordance*). This would for instance be the case if supportive publications would prefer to cite other supportive publications, and if non-supportive publications would prefer to cite other non-supportive publications. If citation would be based on the concordance of study conclusion, it would be another measure of citation bias. To test if concordance on several characteristics has an impact on the likelihood of citation, univariate and adjusted (for study design) fixed-effects logistic regression analyses were applied.

The results are shown in the table below. It shows that publications with one or more authors in common tended to cite each other ('self-citation'), and also, to a lesser extent, publications with a corresponding author from the same continent.

**Concordance odds ratios (95% CI's) for the likelihood of being cited, all types of publications included, N = 96, n = 4317).**

| Determinant                                  | Crude OR        | Adjusted OR *   |
|----------------------------------------------|-----------------|-----------------|
| Study Conclusion (conc. vs. not, n = 3364)   | 1.2 (1.0 – 1.5) | 1.2 (1.0 – 1.4) |
| Article Type (conc. vs. not)                 | 0.4 (0.3 – 0.5) |                 |
| Funding Source (conc. vs. not, n = 1669)**   | 0.8 (0.6 – 1.0) | 0.7 (0.5 – 0.9) |
| Publisher (conc. vs. not, n = 3953)          | 1.1 (0.8 – 1.4) | 1.1 (0.9 – 1.5) |
| Author Affiliation (conc. vs. not, n = 4152) | 1.1 (0.9 – 1.3) | 1.0 (0.8 – 1.2) |
| Author Gender (conc. vs. not, n = 3705)***   | 1.1 (0.9 – 1.3) | 1.1 (0.9 – 1.3) |
| Author Continent (conc. vs. not)             | 1.7 (1.5 – 2.0) | 1.8 (1.5 – 2.1) |
| Self-citation (yes vs no)                    | 3.9 (2.8 – 5.5) | 4.1 (2.9 – 5.7) |

\* adjusted for study design of cited publication; \*\* publications without reported funding source excluded from analysis; \*\*\* publications with unclear author's gender excluded from analysis; N: number of publication. n: number of potential citation paths. **conc**: concordant

**Text S2. Search strategy and inclusion criteria**

We applied the following search query on the Web of Science Core Collection (WoSCC): (*diesel*) and (*exhaust or “particulate matter” or microparticles or emissions or exposure*) ) AND ( (*cancer or carcino\* or neoplasm or tumo\**) ). The search was performed by BD on 11 June 2018. Publications investigating the association between diesel exhaust exposure and lung cancer were included. This includes publications that assessed diesel exhaust exposure by proxy of job occupation. Only English language publications with document type Article, Review or Letter were included. Editorials were excluded, as well as publications with an ecological design or with non-human subjects. Selection was performed in three steps: first based on title, then on abstract and finally on full-text.

**Text S3. Data extraction**

Most variables are described in the main document. Here follows some additional information for some of the variables.

**Study conclusion** was based on the authors' conclusion on the DEE - LC hypothesis, and had the following outcomes: 1. supportive (positive association); 2. no association; 3. unclear association (no conclusion can be drawn based on the included evidence); 4. mixed (supportive in some subgroup(s), no association in other subgroup(s)); or 5. no conclusion on DEE - LC was stated. In the analyses, supportive publications were compared with non-supportive publications, that either reported to have 2. no association or 3. unclear association. If the authors of a publication only stated that there is an association between DEE and LC in the expected direction, we scored the publication as supportive. If they additionally stated that it remains unclear whether DEE causes lung cancer, we scored it as non-supportive (unclear association).

**Type of exposure assessment.** Many of the early studies assessed exposure by means of job proxy. Later on more sophisticated methods were employed. We distinguished between four types of assessment: 1) job title, 2) participants' self-assessment, 3) quantified estimate based on a static job-exposure matrix (without time component), or by an industrial hygienist, and 4) quantified estimate based on dynamic job-exposure matrix (with time component), taking into account changes over time in diesel exposure and participants' job or working hours.

**Type of diesel exhaust exposure** changed over time due to improved diesel motor and fuel technology, leading to less exhaust containing fewer harmful particles. Roughly three types of diesel exhaust have been differentiated in the literature: traditional (up to

1988), transitional, and new technology diesel (2006 and after) (22, 23). To study the present-day carcinogenicity of diesel exhausts, it makes more sense to focus on newer (and potentially less carcinogenic) types of diesel exhaust rather than the old ones (13). Similarly, one might argue that publications on newer types of diesel exhaust are more relevant to cite to. We extracted the exposure period and used it to code type of diesel exposure as ‘traditional’ or ‘mix of traditional and transitional’. Publications on newer diesel types were not yet available. One might argue that type of diesel exhaust exposure is as an indicator of study relevance rather than study quality, but for the purpose of readability we consider it as an indicator of study quality as well. After all, both the relevance and the quality of a study would justify the citation of one publication over the other.

**Gender of the corresponding author** was assessed by first name, with help of [www.genderchecker.com](http://www.genderchecker.com); if first name was not given, other articles of the same author were searched, and the profile of the author at the university or at [www.researchgate.com](http://www.researchgate.com) was checked.

**Time to citation** was the number of years between the publication date of the cited publication and the submission date of the citing publication. This variable was not used as determinant of citation, but to determine the dataset of potential citation paths: only citation paths with a positive value for *time to citation* were considered a **potential citation**, and only potential citations were included in our dataset. So even if the citing publication was submitted only one day after the citing publication was published, it would be considered a potential citation. In addition, this variable was used to create the graph on the likelihood of citation over time (Figure 2a in the main document).

As *publication date* we used either the online publication date or the paper publication date, whichever was first. The average duration from submission to publication was 10 months in this network. For 48 publications the *submission date* was not stated. In these cases, it was estimated by subtracting 10 months from the publication date.

**Source of funding.** The scoring of source of funding is not as straight-forward as it seems. The name of the funding organisation can be quite deceiving, as well as its status as a non-profit organisation. For example, the E.U.G.T. - the Europäische Forschungseinrichtung für Umwelt und Gesundheit im Transportsektor e.V., or European Research Group on Environment and Health in the Transport Sector -, was a legally independent organisation funded by Volkswagen, BMW, and Daimler. The name, though, sounds very neutral, and its legal status 'e.V.' does not suggest it is a commercial entity either. Its mission statement is also quite misleading. According to a secondary source, its mission statement is to investigate and document, without prejudice, the consequences of traffic for man and environment (<https://www.trouw.nl/samenleving/volkswagen-zette-mens-in-als-proefkonijn~a4ab8fa5/>). (The organisation itself has been disbanded and the website no longer exists, so we had to rely on secondary sources.)

Therefore, to score the funding source, we checked the organisations' website, and other online sources to retrieve additional information. If the organisation was known as a non-profit organisation, but received funds from for-profit organisations, we scored it as for-profit (or as both for-profit and non-profit).

**Specificity.** The specificity of a study depends on several issues: the aim of the study; whether the link with diesel exhaust exposure is made (or motor exposure but

diesel exposure is more *specific*), the number of determinants / job occupations unrelated to diesel exposure, the number of health outcomes other than lung cancer. In case of reviews, we also take the type of studies (epidemiological vs animal / in-vitro studies) into account, and how much space is focused on mechanisms or background information on diesel composition or regulations. If the study is only on the relationship between diesel exhaust exposure and lung cancer, it is scored as 4. For each of the issues above in which the study does not fit our purposes, a point was subtracted from the score.

**Authority.** Authority was calculated for each author and each year separately, by counting the number of within-network citations to all publications in which the author had been involved. As the number of citations is likely to increase each year, so does the author's authority. Because we were interested in the authority at the moment of citation, the authority value of a cited publication also depends on the publication year of the citing publication. In case of multiple authors, we used the authority value of the author with the highest authority in that year.

**Text S4. Dependent variable *citation***

Our dependent variable, whether a potential citation had occurred or not, was determined by the built-in algorithm of CitNetExplorer. This algorithm makes use of reference lists that can be downloaded from the Web of Science Core Collection. It links the reference lists of the publications in the network with the actual publications in the network. If possible, this linkage was done by DOI, the unique Digital Object Identifier assigned to most present-day publications; otherwise it was based on a combination of first author's surname, first author's first initial, publication year, volume number and first page number. For more information on the linkage algorithm, see van Eck NJ, Waltman L. CitNetExplorer: A new software tool for analyzing and visualizing citation networks. *Journal of Informetrics*. 2014;8(4):802-23.

**Text S5. References of included literature on the DEE – LC hypothesis.**

1. Ahlman K, Koskela RS, Kuikka P, Koponen M, Annanmaki M. Mortality among sulfide ore miners. *Am J Ind Med.* 1991;19(5):603-17.
2. Attfield MD, Schleiff PL, Lubin JH, Blair A, Stewart PA, Vermeulen R, et al. The Diesel Exhaust in Miners Study: A cohort mortality study with emphasis on lung cancer. *JNCI- Natl Cancer Inst.* 2012;104(11):869-83.
3. Bergdahl IA, Jonsson H, Eriksson K, Damber L, Jarvholm B. Lung cancer and exposure to quartz and diesel exhaust in Swedish iron ore miners with concurrent exposure to radon. *Occup Environ Med.* 2010;67(8):513-8.
4. Bhatia R, Lopipero P, Smith AH. Diesel exhaust exposure and lung cancer. *Epidemiology.* 1998;9(1):84-91.
5. Birdsey J, Alterman T, Li J, Petersen MR, Sestito J. Mortality among members of a truck driver trade association. *Aaohn J.* 2010;58(11):473-80.
6. Boffetta P, Dosemeci M, Gridley G, Bath H, Moradi T, Silverman D. Occupational exposure to diesel engine emissions and risk of cancer in Swedish men and women. *Cancer Causes Control.* 2001;12(4):365-74.
7. Boffetta P, Harris RE, Wynder EL. Diesel exhaust exposure and lung-cancer risk. *Experimental Pathology.* 1989;37(1-4):32-8.
8. Boffetta P, Harris RE, Wynder EL. Case-control study on occupational exposure to diesel exhaust and lung-cancer risk. *Am J Ind Med.* 1990;17(5):577-91.
9. Boffetta P, Stellman SD, Garfinkel L. Diesel exhaust exposure and mortality among males in the American-Cancer-Society prospective-study. *Am J Ind Med.* 1988;14(4):403-15.
10. Brown AM, Christie D, Taylor R, Seccombe MA, Coates MS. The occurrence of cancer in a cohort of New South Wales coal miners. *Aust N Z Publ Health.* 1997;21(1):29-32.
11. Bruske-Hohlfeld I, Mohner M, Ahrens W, Pohlabein H, Heinrich J, Kreuzer M, et al. Lung cancer risk in male workers occupationally exposed to diesel motor emissions in Germany. *Am J Ind Med.* 1999;36(4):405-14.
12. Bruske-Hohlfeld I, Mohner M, Pohlabein H, Ahrens W, Bolm-Audorff U, Kreienbrock L, et al. Occupational lung cancer risk for men in Germany: Results from a pooled case-control study. *Am J Epidemiol.* 2000;151(4):384-95.
13. Bunn WB, Hesterberg TW, Valberg PA, Slavin TJ, Hart G, Lapin CA. A reevaluation of the

- literature regarding the health assessment of diesel engine exhaust. *Inhal Toxicol.* 2004;16(14):889-900.
14. Burns PB, Swanson GM. The Occupational-Cancer Incidence Surveillance Study (OCISS) - risk of lung-cancer by usual occupation and industry in the detroit metropolitan-area. *Am J Ind Med.* 1991;19(5):655-71.
  15. Chau N, Benamghar L, Pham QT, Teculescu D, Rebstock E, Mur JM. Mortality of iron miners in Lorraine (France) - relations between lung-function and respiratory symptoms and subsequent mortality. *British Journal of Industrial Medicine.* 1993;50(11):1017-31.
  16. Chen GB, Wan X, Yang GH, Zou XN. Traffic-related air pollution and lung cancer: A meta-analysis. *Thorac Cancer.* 2015;6(3):307-18.
  17. Cohen AJ, Pope CA. Lung cancer and air pollution. *Environ Health Perspect.* 1995;103:219-24.
  18. Cox LA. Does diesel exhaust cause human lung cancer? *Risk Anal.* 1997;17(6):807-29.
  19. Crump KS. Lung cancer mortality and diesel exhaust: Reanalysis of a retrospective cohort study of US railroad workers. *Inhal Toxicol.* 1999;11(1):1-17.
  20. Crump KS, Van Landingham C, McClellan RO. Influence of alternative exposure estimates in the Diesel Exhaust Miners Study: Diesel exhaust and lung cancer. *Risk Anal.* 2016;36(9):1803-12.
  21. Crump KS, Van Landingham C, Moolgavkar SH, McClellan R. Reanalysis of the DEMS nested case-control study of lung cancer and diesel exhaust: Suitability for quantitative risk assessment. *Risk Anal.* 2015;35(4):676-700.
  22. Dawson SV, Alexeeff GV. Multi-stage model estimates of lung cancer risk from exposure to diesel exhaust, based on a US railroad worker cohort. *Risk Anal.* 2001;21(1):1-18.
  23. De Matteis S, Consonni D, Lubin JH, Tucker M, Peters S, Vermeulen RCH, et al. Impact of occupational carcinogens on lung cancer risk in a general population. *Int J Epidemiol.* 2012;41(3):711-21.
  24. Emmelin A, Nystrom L, Wall S. Diesel exhaust exposure and smoking - a case-referent study of lung-cancer among Swedish dock workers. *Epidemiology.* 1993;4(3):237-44.
  25. Forastiere F, Perucci CA, Dipietro A, Miceli M, Rapiti E, Bargagli A, et al. Mortality among urban policemen in Rome. *Am J Ind Med.* 1994;26(6):785-98.
  26. Frumkin H, Thun MJ. Diesel exhaust. *CA-Cancer J Clin.* 2001;51(3):193-8.

27. Gamble J. Lung cancer and diesel exhaust: A critical review of the occupational epidemiology literature. *Crit Rev Toxicol.* 2010;40(3):189-244.
28. Gamble JF, Nicolich MJ, Boffetta P. Lung cancer and diesel exhaust: An updated critical review of the occupational epidemiology literature. *Crit Rev Toxicol.* 2012;42(7):549-98.
29. Garshick E, Laden F, Hart JE, Davis ME, Eisen EA, Smith TJ. Lung cancer and elemental carbon exposure in trucking industry workers. *Environ Health Perspect.* 2012;120(9):1301-6.
30. Garshick E, Laden F, Hart JE, Rosner B, Davis ME, Eisen EA, et al. Lung cancer and vehicle exhaust in trucking industry workers. *Environ Health Perspect.* 2008;116(10):1327-32.
31. Garshick E, Laden F, Hart JE, Rosner B, Smith TJ, Dockery DW, et al. Lung cancer in railroad workers exposed to diesel exhaust. *Environ Health Perspect.* 2004;112(15):1539-43.
32. Garshick E, Laden F, Hart JE, Smith TJ, Rosner B. Smoking imputation and lung cancer in railroad workers exposed to diesel exhaust. *Am J Ind Med.* 2006;49(9):709-18.
33. Garshick E, Schenker MB, Munoz A, Segal M, Smith TJ, Woskie SR, et al. A retrospective cohort study of lung-cancer and diesel exhaust exposure in railroad workers. *Am Rev Respir Dis.* 1988;137(4):820-5.
34. Grandjean P, Andersen O. Lung-cancer in filling station attendants. *Am J Ind Med.* 1991;20(6):763-8.
35. Guberan E, Usel M, Raymond L, Bolay J, Fioretta G, Puissant J. Increased risk for lung-cancer and for cancer of the gastrointestinal-tract among Geneva professional drivers. *British Journal of Industrial Medicine.* 1992;49(5):337-44.
36. Guida F, Papadopoulos A, Menvielle G, Matrat M, Fevotte J, Cenee S, et al. Risk of lung cancer and occupational history results of a French population-based case-control study, the ICARE study. *J Occup Environ Med.* 2011;53(9):1068-77.
37. Guo J, Kauppinen T, Kyyronen P, Lindbohm ML, Heikkila P, Pukkala E. Occupational exposure to diesel and gasoline engine exhausts and risk of lung cancer among Finnish workers. *Am J Ind Med.* 2004;45(6):483-90.
38. Gustavsson P, Jakobsson R, Nyberg F, Pershagen G, Jarup L, Scheele P. Occupational exposure and lung cancer risk: A population-based case-referent study in Sweden. *Am J Epidemiol.* 2000;152(1):32-40.
39. Gustavsson P, Plato N, Lidstrom EB, Hogstedt C. Lung-cancer and exposure to diesel exhaust among bus garage workers. *Scand J Work Environ Health.* 1990;16(5):348-54.

40. Hansen ES. A follow-up-study on the mortality of truck drivers. *Am J Ind Med.* 1993;23(5):811-21.
41. Hansen J, Raaschou-Nielsen O, Olsen JH. Increased risk of lung cancer among different types of professional drivers in Denmark. *Occup Environ Med.* 1998;55(2):115-8.
42. Hemminki K, Pershagen G. Cancer risk of air-pollution - epidemiologic evidence. *Environ Health Perspect.* 1994;102:187-92.
43. Hesterberg TW, Long CM, Bunn WB, Lapin CA, McClellan RO, Valberg PA. Health effects research and regulation of diesel exhaust: An historical overview focused on lung cancer risk. *Inhal Toxicol.* 2012;24:1-45.
44. Ilar A, Plato N, Lewne M, Pershagen G, Gustavsson P. Occupational exposure to diesel motor exhaust and risk of lung cancer by histological subtype: A population-based case-control study in Swedish men. *Eur J Epidemiol.* 2017;32(8):711-9.
45. Jakobsson R, Gustavsson P, Lundberg I. Increased risk of lung cancer among male professional drivers in urban but not rural areas of Sweden. *Occup Environ Med.* 1997;54(3):189-93.
46. Jarvholm B, Silverman D. Lung cancer in heavy equipment operators and truck drivers with diesel exhaust exposure in the construction industry. *Occup Environ Med.* 2003;60(7):516-20.
47. Jockel KH, Ahrens W, Jahn I, Pohlabein H, Bolm-Audorff U. Occupational risk factors for lung cancer: A case-control study in West Germany. *Int J Epidemiol.* 1998;27(4):549-60.
48. Kauppinen T, Heikkila P, Partanen T, Virtanen SV, Pukkala E, Ylostalo P, et al. Mortality and cancer incidence of workers in Finnish road paving companies. *Am J Ind Med.* 2003;43(1):49-57.
49. Kauppinen TP, Partanen TJ, Hernberg SG, Nickels JI, Luukkonen RA, Hakulinen TR, et al. Chemical exposures and respiratory cancer among Finnish woodworkers. *British Journal of Industrial Medicine.* 1993;50(2):143-8.
50. Koh DH, Kong HJ, Oh CM, Jung KW, Park D, Won YJ. Lung cancer risk in professional drivers in Korea: A population-based proportionate cancer incidence ratio study. *J Occup Health.* 2015;57(4):324-30.
51. Laden F, Hart JE, Eschenroeder A, Smith TJ, Garshick E. Historical estimation of diesel exhaust exposure in a cohort study of US railroad workers and lung cancer. *Cancer Causes Control.* 2006;17(7):911-9.

52. Laden F, Hart JE, Smith TJ, Davis ME, Garshick E. Cause-specific mortality in the unionized US trucking industry. *Environ Health Perspect.* 2007;115(8):1192-6.
53. Larkin EK, Smith TJ, Stayner L, Rosner B, Speizer FE, Garshick E. Diesel exhaust exposure and lung cancer: Adjustment for the effect of smoking in a retrospective cohort study. *Am J Ind Med.* 2000;38(4):399-409.
54. Lee MLT, Whitmore GA, Laden F, Hart JE, Garshick E. Assessing lung cancer risk in railroad workers using a first hitting time regression model. *Environmetrics.* 2004;15(5):501-12.
55. Lee MLT, Whitmore GA, Laden F, Hart JE, Garshick E. A case-control study relating railroad worker mortality to diesel exhaust exposure using a threshold regression model. *J Stat Plan Infer.* 2009;139(5):1633-42.
56. Lipsett M, Campleman S. Occupational exposure to diesel exhaust and lung cancer: A meta-analysis. *Am J Public Health.* 1999;89(7):1009-17.
57. Luqman M, Javed MM, Daud S, Raheem N, Ahmad J, Khan AUH. Risk factors for lung cancer in the Pakistani population. *Asian Pac J Cancer Prev.* 2014;15(7):3035-9.
58. Matrat M, Guida F, Cenee S, Fevotte J, Carton M, Cyr D, et al. Occupational exposure to diesel motor exhaust and lung cancer: A dose-response relationship hidden by asbestos exposure adjustment? The ICARE study. *J Cancer Epidemiol.* 2015:10.
59. Michaels D, Zoloth SR. Mortality among urban bus drivers. *Int J Epidemiol.* 1991;20(2):399-404.
60. Mohner M, Kersten N, Gellissen J. Diesel motor exhaust and lung cancer mortality: Reanalysis of a cohort study in potash miners. *Eur J Epidemiol.* 2013;28(2):159-68.
61. Mohner M, Wendt A. A critical review of the relationship between occupational exposure to diesel emissions and lung cancer risk. *Crit Rev Toxicol.* 2017;47(3):185-224.
62. Morgan WKC, Reger RB, Tucker DM. Health effects of diesel emissions. *Ann Occup Hyg.* 1997;41(6):643-58.
63. Muscat JE, Wynder EL. Diesel-engine exhaust and lung-cancer - an unproved association. *Environ Health Perspect.* 1995;103(9):812-8.
64. Nadon L, Siemiatycki J, Dewar R, Krewski D, Gerin M. Cancer risk due to occupational exposure to polycyclic aromatic-hydrocarbons. *Am J Ind Med.* 1995;28(3):303-24.
65. Neumeyer-Gromen A, Razum O, Kersten N, Seidler A, Zeeb H. Diesel motor emissions and lung cancer mortality-results of the second follow-up of a cohort study in potash miners. *Int J*

Cancer. 2009;124(8):1900-6.

66. Noksokoivisto P, Pukkala E. Past exposure to asbestos and combustion products and incidence of cancer among Finnish locomotive drivers. *Occup Environ Med*. 1994;51(5):330-4.
67. Olsson AC, Gustavsson P, Kromhout H, Peters S, Vermeulen R, Bruske I, et al. Exposure to diesel motor exhaust and lung cancer risk in a pooled analysis from case-control studies in Europe and Canada. *Am J Respir Crit Care Med*. 2011;183(7):941-8.
68. Parent ME, Rousseau MC, Boffetta P, Cohen A, Siemiatycki J. Exposure to diesel and gasoline engine emissions and the risk of lung cancer. *Am J Epidemiol*. 2007;165(1):53-62.
69. Petersen A, Hansen J, Olsen JH, Netterstrom B. Cancer morbidity among Danish male urban bus drivers: A historical cohort study. *Am J Ind Med*. 2010;53(7):757-61.
70. Pfluger DH, Minder CE. A mortality study of lung-cancer among Swiss professional drivers - accounting for the smoking-related fraction by a multivariate approach. *Sozial-und Pravent*. 1994;39(6):372-8.
71. Ping C, Guang X. A review of the health effects and exposure-responsible relationship of diesel particulate matter for underground mines. *Int J Min Sci Technol*. 2017;27(5):831-8.
72. Pintos J, Parent ME, Richardson L, Siemiatycki J. Occupational exposure to diesel engine emissions and risk of lung cancer: Evidence from two case-control studies in Montreal, Canada. *Occup Environ Med*. 2012;69(11):787-92.
73. Rafnsson V, Gunnarsdottir H. Mortality among professional drivers. *Scand J Work Environ Health*. 1991;17(5):312-7.
74. Richiardi L, Mirabelli D, Calisti R, Ottino A, Ferrando A, Boffetta P, et al. Occupational exposure to diesel exhausts and risk for lung cancer in a population-based case-control study in Italy. *Ann Oncol*. 2006;17(12):1842-7.
75. Ris C. US EPA health assessment for diesel engine exhaust: A review. *Inhal Toxicol*. 2007;19:229-39.
76. Rona RJ, Taub NA, Rasmussen S. Case-control studies in cancer-patients as a surveillance system of occupational exposure in the European-community. *J Epidemiol Community Health*. 1993;47(4):320-5.
77. Saverin R, Braunlich A, Dahmann D, Enderlein C, Heuchert G. Diesel exhaust and lung cancer mortality in potash mining. *Am J Ind Med*. 1999;36(4):415-22.
78. Silverman DT, Samanic CM, Lubin JH, Blair AE, Stewart PA, Vermeulen R, et al. The

Diesel Exhaust in Miners Study: A nested case-control study of lung cancer and diesel exhaust. *J Natl Cancer Inst.* 2012;104(11):855-68.

79. Sodhi-Berry N, Reid A, Fritschi L, Musk AW, Vermeulen R, de Klerk N, et al. Cancer incidence in the Western Australian mining industry (1996-2013). *Cancer Epidemiol.* 2017;49:8-18.
80. Soll-Johanning H, Bach E, Jensen SS. Lung and bladder cancer among Danish urban bus drivers and tramway employees: A nested case-control study. *Occup Med-Oxf.* 2003;53(1):25-33.
81. Soll-Johanning H, Bach E, Olsen JH, Tuchsén F. Cancer incidence in urban bus drivers and tramway employees: A retrospective cohort study. *Occup Environ Med.* 1998;55(9):594-8.
82. Steenland K, Deddens J, Stayner L. Diesel exhaust and lung cancer in the trucking industry: Exposure-response analyses and risk assessment. *Am J Ind Med.* 1998;34(3):220-8.
83. Stern F, HaringSweeney M. Proportionate mortality among unionized construction operating engineers. *Am J Ind Med.* 1997;32(1):51-65.
84. Stober W, Abel UR. Lung cancer due to diesel soot particles in ambient air? A critical appraisal of epidemiological studies addressing this question. *Int Arch Occup Environ Health.* 1996;68:S3-S61.
85. Stober W, Abel UR, McClellan RO. Revisiting epidemiological key studies on occupational diesel exhaust exposure and lung cancer in truck drivers. *Inhal Toxicol.* 1998;10(12):1045-78.
86. Sun Y, Bochmann F, Nold A, Mattenklott M. Diesel exhaust exposure and the risk of lung cancer-a review of the epidemiological evidence. *Int J Environ Res Public Health.* 2014;11(2):1312-40.
87. Swanson GM, Lin CS, Burns PB. Diversity in the association between occupation and lung-cancer among black-and-white men. *Cancer Epidemiol Biomarkers Prev.* 1993;2(4):313-20.
88. Tse LA, Yu ITS, Au JSK, Qiu H, Wang XR. Silica dust, diesel exhaust, and painting work are the significant occupational risk factors for lung cancer in nonsmoking Chinese men. *Br J Cancer.* 2011;104(1):208-13.
89. Tse LA, Yu ITS, Qiu H, Au JSK, Wang XR. Occupational risks and lung cancer burden for Chinese men: A population-based case-referent study. *Cancer Causes Control.* 2012;23(1):121-31.
90. Tsoi CT, Tse LA. Professional drivers and lung cancer: A systematic review and meta-analysis. *Occup Environ Med.* 2012;69(11):831-6.
91. Tual S, Silverman DT, Koutros S, Blair A, Sandler DP, Lebailly P, et al. Use of dieselized farm equipment and incident lung cancer: Findings from the Agricultural Health Study cohort.

Environ Health Perspect. 2016;124(5):611-8.

92. Valberg PA, Watson AY. Lack of concordance between reported lung-cancer risk levels and occupation-specific diesel-exhaust exposure. *Inhal Toxicol.* 2000;12:199-208.
93. Vandeneeden SK, Friedman GD. Exposure to engine exhaust and risk of subsequent cancer. *J Occup Environ Med.* 1993;35(3):307-11.
94. Villeneuve PJ, Parent ME, Sahni V, Johnson KC, Canadian Canc R. Occupational exposure to diesel and gasoline emissions and lung cancer in Canadian men. *Environ Res.* 2011;111(5):727-35.
95. Vineis P, Forastiere F, Hoek G, Lipsett M. Outdoor air pollution and lung cancer: Recent epidemiologic evidence. *Int J Cancer.* 2004;111(5):647-52.
96. Wild P, Gonzalez M, Bourgkard E, Courouble N, Clement-Duchene C, Martinet Y, et al. Occupational risk factors have to be considered in the definition of high-risk lung cancer populations. *Br J Cancer.* 2012;106(7):1346-52.

**Table S1. Top 5 of publications (above) and authors (below) within network, based on the number of received citations up to 2017.**

| Article rank | Publication's first author | Title                                                                                              | Year | Nr. of received citations (% of potential citations) |
|--------------|----------------------------|----------------------------------------------------------------------------------------------------|------|------------------------------------------------------|
| 1            | Bhatia                     | Diesel exhaust exposure and lung cancer                                                            | 1998 | 34 (57%)                                             |
| 2            | Garschick                  | A retrospective cohort study of lung-cancer and diesel exhaust exposure in railroad workers        | 1988 | 34 (36%)                                             |
| 3            | Boffetta                   | Diesel exhaust exposure and mortality among males in the American-cancer-society prospective-study | 1988 | 30 (32%)                                             |
| 4            | Lipsett                    | Occupational exposure to diesel exhaust and lung cancer: A meta-analysis                           | 1999 | 28 (53%)                                             |
| 5            | Gustavsson                 | Lung-cancer and exposure to diesel exhaust among bus garage workers                                | 1990 | 26 (30%)                                             |

  

| Author rank | Author         | Affiliation                                                                                                                                                                                                                                                                                                                                       | Country       | Nr. of received citations (= authority) |
|-------------|----------------|---------------------------------------------------------------------------------------------------------------------------------------------------------------------------------------------------------------------------------------------------------------------------------------------------------------------------------------------------|---------------|-----------------------------------------|
| 1           | Paolo Boffetta | The Tisch Cancer Institute and Institute for Translational Epidemiology, Mount Sinai School of Medicine in New York.<br>International Prevention research Institute.                                                                                                                                                                              | USA<br>France | 116                                     |
| 2           | Eric Garshick  | Pulmonary and Critical Care Medicine Section, VA Boston Healthcare System, Boston, Massachusetts.<br>Channing Division of Network Medicine, Brigham and Women's Hospital, Harvard Medical School, Boston, Massachusetts.                                                                                                                          | USA           | 112                                     |
| 3           | T. J. Smith    | Exposure, Epidemiology and Risk Program, Department of Environmental Health, Harvard School of Public Health, Boston, Massachusetts.                                                                                                                                                                                                              | USA           | 108                                     |
| 4/5         | Francine Laden | Channing Division of Network Medicine, Brigham and Women's Hospital, Harvard Medical School, Boston, Massachusetts<br>Exposure, Epidemiology and Risk Program, Department of Environmental Health, Harvard School of Public Health, Boston, Massachusetts.<br>Department of Epidemiology, Harvard School of Public Health, Boston, Massachusetts. | USA           | 72                                      |
| 4/5         | Jamie E. Hart  | Channing Division of Network Medicine, Brigham and Women's Hospital, Harvard Medical School, Boston, Massachusetts, USA                                                                                                                                                                                                                           | USA           | 72                                      |

**Table S2.** All characteristics of the publications in the network on the DEE – LC hypothesis.

| Characteristic                                   | Category                    | N publications | n potential citations | n actual citations (%) |
|--------------------------------------------------|-----------------------------|----------------|-----------------------|------------------------|
| Study Conclusion                                 | supportive                  | 51             | 2294                  | 450 (20%)              |
|                                                  | no association              | 9              | 529                   | 76 (14%)               |
|                                                  | unclear association         | 25             | 916                   | 115 (13%)              |
|                                                  | mixed                       | 2              | 116                   | 17 (15%)               |
|                                                  | not reported                | 9              | 462                   | 20 (4%)                |
| Publication Type / Study Design                  | Empirical                   | 74             | 3455                  | 552 (16%)              |
|                                                  | case-control                | 34             | 1378                  | 228 (17%)              |
|                                                  | cohort                      | 40             | 2077                  | 324 (16%)              |
|                                                  | Review                      | 22             | 862                   | 126 (15%)              |
|                                                  | narrative review            | 17             | 721                   | 60 (8%)                |
|                                                  | systematic review           | 5              | 141                   | 66 (47%)               |
|                                                  | with meta-analysis          | 4              | 131                   | 64 (49%)               |
| Specificity                                      | very broad                  | 15             | 824                   | 41 (5%)                |
|                                                  | broad                       | 19             | 1482                  | 157 (11%)              |
|                                                  | specific                    | 27             | 1069                  | 217 (20%)              |
|                                                  | very specific               | 25             | 942                   | 263 (28%)              |
| Sample Size<br>(cat; for empirical publications) | low (< 2500)                | 23             | 1116                  | 130 (12%)              |
|                                                  | medium (2500 – 10000)       | 23             | 1101                  | 167 (15%)              |
|                                                  | high (=> 10000)             | 28             | 1238                  | 255 (21%)              |
| Conclusive title                                 | no                          | 90             | 3967                  | 640 (16%)              |
|                                                  | yes                         | 6              | 350                   | 38 (11%)               |
| Type of Diesel Exhaust Exposure                  | mostly traditional          | 47             | 2929                  | 427 (15%)              |
|                                                  | traditional & transitional  | 27             | 526                   | 125 (24%)              |
| Type of Exposure Assessment                      | Job Title or Self-Reported  | 38             | 2094                  | 232 (11%)              |
|                                                  | by job title                | 28             | 1632                  | 151 (9%)               |
|                                                  | by questionnaire            | 10             | 462                   | 81 (18%)               |
|                                                  | JEM or Hygienist            | 36             | 1361                  | 320 (24%)              |
|                                                  | by hygienist or JEM         | 19             | 879                   | 211 (24%)              |
|                                                  | by JEM, with time component | 17             | 482                   | 109 (23%)              |
| Smoking Adjustment                               | no                          | 26             | 1488                  | 215 (14%)              |
|                                                  | yes                         | 48             | 1967                  | 337 (17%)              |
| Funding Source                                   | exclusively non-profit      | 46             | 1968                  | 374 (19%)              |
|                                                  | exclusively for-profit      | 9              | 294                   | 61 (21%)               |
|                                                  | both profit and non-profit  | 5              | 158                   | 30 (19%)               |
|                                                  | not reported / unclear      | 36             | 1897                  | 213 (11%)              |
| Number of Authors                                | 1 - 2                       | 25             | 1422                  | 144 (10%)              |
|                                                  | 3 – 5                       | 42             | 1869                  | 329 (18%)              |
|                                                  | => 6                        | 29             | 1026                  | 205 (20%)              |

|                        |                               |           |             |                  |
|------------------------|-------------------------------|-----------|-------------|------------------|
| Number of Affiliations | 1                             | 26        | 1422        | 132 (9%)         |
|                        | 2                             | 28        | 1556        | 244 (16%)        |
|                        | => 3                          | 42        | 1339        | 302 (23%)        |
| Number of References   | < 30                          | 22        | 1003        | 124 (13%)        |
|                        | 30 - 50                       | 44        | 2027        | 319 (16%)        |
|                        | => 50                         | 30        | 1287        | 235 (18%)        |
| Journal Impact Factor  | < 2                           | 30        | 1334        | 170 (13%)        |
|                        | 2 - 4                         | 19        | 497         | 160 (32%)        |
|                        | => 4                          | 19        | 442         | 140 (32%)        |
|                        | not available                 | 28        | 2044        | 208 (10%)        |
| Publisher              | Wiley-Blackwell               | 28        | 1433        | 192 (13%)        |
|                        | BMJ                           | 27        | 664         | 62 (9%)          |
|                        | Elsevier                      | 12        | 144         | 18 (13%)         |
|                        | Taylor & Francis              | 5         | 282         | 36 (13%)         |
|                        | Lippincott Williams & Wilkins | 9         | 234         | 55 (24%)         |
|                        | Biomed Central                | 4         | -           | -                |
|                        | Oxford University Press       | 11        | 459         | 91 (20%)         |
| other                  | 19                            | 1101      | 224 (20%)   |                  |
| Gender                 | male                          | 64        | 3134        | 499 (16%)        |
|                        | female                        | 25        | 853         | 155 (18%)        |
|                        | unclear                       | 7         | 330         | 24 (7%)          |
| Affiliation            | university                    | 36        | 1715        | 263 (15%)        |
|                        | government                    | 30        | 1068        | 197 (18%)        |
|                        | industry                      | 11        | 385         | 49 (13%)         |
|                        | other                         | 19        | 1149        | 169 (15%)        |
| Continent              | Europe                        | 41        | 2078        | 266 (13%)        |
|                        | Scandinavia                   | 20        | 1185        | 157 (13%)        |
|                        | North-America                 | 47        | 2165        | 408 (19%)        |
|                        | Asia / Australia              | 8         | 74          | 4 (5%)           |
| Authority              | low                           |           | 1438        | 123 (9%)         |
|                        | medium                        |           | 1486        | 235 (16%)        |
|                        | high                          |           | 1393        | 320 (23%)        |
| Conclusive title       | no                            |           | 4159        | 614 (15%)        |
|                        | yes                           |           | 158         | 64 (41%)         |
| <b>Total</b>           |                               | <b>96</b> | <b>4317</b> | <b>678 (16%)</b> |

**Notes.** JEM Job-Exposure Matrix. BMJ British Medical Journal

**Table S3. Odds ratios (95% CI's) for the likelihood of empirical publications to be cited by reviews (n = 900).**

| <b>Publication characteristics,</b>                      |                        |                            |
|----------------------------------------------------------|------------------------|----------------------------|
| <b>study outcome</b>                                     | <b>Crude OR</b>        | <b>Adjusted OR *</b>       |
| Study Conclusion (supportive vs non-supportive, n = 767) | <b>1.5 (1.1 – 2.1)</b> | 1.2 (0.8 – 1.8)            |
| <b>Publication characteristics,</b>                      |                        |                            |
| <b>methodological quality indicators</b>                 | <b>Crude OR</b>        | <b>Adjusted OR</b>         |
| Study Design (cohort vs case-control)                    | 1.0 (0.8 – 1.4)        | 1.4 (0.9 – 2.1) **         |
| Sample Size (ref: low)                                   |                        |                            |
| medium                                                   | 1.2 (0.8 – 1.8)        | 1.5 (1.0 – 2.3) ***        |
| high                                                     | <b>2.1 (1.5 – 3.1)</b> | <b>2.6 (1.6 – 4.1) ***</b> |
| Type of diesel exposure (mix vs trad.)                   | 1.4 (0.9 – 2.1)        | 1.0 (0.7 – 1.6) ***        |
| Type of Exposure Assessment (JEM vs job/self-reported)   | <b>2.6 (1.9 – 3.6)</b> | <b>2.8 (2.0 – 3.9) ***</b> |
| Smoking Adjustment (yes vs no)                           | 1.3 (0.9 – 1.7)        | 1.2 (0.8 – 1.9) ***        |
| <b>Publication characteristics,</b>                      |                        |                            |
| <b>other</b>                                             | <b>Crude OR</b>        | <b>Adjusted OR *</b>       |
| Conclusive Title (yes vs no)                             | ****                   | ****                       |
| Specificity (ref: very low)                              |                        |                            |
| low                                                      | <b>2.4 (1.4 – 3.9)</b> | <b>2.2 (1.3 – 3.7)</b>     |
| high                                                     | <b>7.9 (4.6 – 14)</b>  | <b>7.8 (4.2 – 14)</b>      |
| very high                                                | <b>11 (6.3 – 19)</b>   | <b>10 (5.2 – 20)</b>       |
| Funding Source (ref: exclusively non-profit)             |                        |                            |
| for-profit                                               | 1.4 (0.8 – 2.3)        | 1.3 (0.7 – 2.2)            |
| not reported                                             | <b>0.6 (0.5 – 0.9)</b> | 0.8 (0.5 – 1.1)            |
| Number of Authors (ref: 1-2)                             |                        |                            |
| 3 - 5                                                    | <b>2.3 (1.5 – 3.4)</b> | <b>2.0 (1.2 – 3.1)</b>     |
| >= 6                                                     | <b>1.9 (1.2 – 2.9)</b> | 1.2 (0.7 – 2.0)            |
| Number of Affiliations (ref: 1)                          |                        |                            |
| 2                                                        | <b>2.4 (1.6 – 3.5)</b> | <b>2.6 (1.7 – 4.0)</b>     |
| >= 3                                                     | <b>2.6 (1.7 – 3.8)</b> | 1.4 (0.8 – 2.3)            |
| Number of References (ref: <30)                          |                        |                            |
| 30 - 50                                                  | 1.3 (0.9 – 1.8)        | 1.2 (0.8 – 1.8)            |
| >= 50                                                    | 1.1 (0.7 – 1.7)        | 1.1 (0.7 – 1.7)            |

| <b>Journal characteristics</b>            | <b>Crude OR</b>        | <b>Adjusted OR *</b>   |
|-------------------------------------------|------------------------|------------------------|
| Journal Impact Factor (ref: 0-2, n = 442) |                        |                        |
| 2 – 4                                     | 1.3 (0.7 – 2.2)        | 1.8 (0.9 – 3.7)        |
| >= 4                                      | <b>4.2 (2.5 – 7.1)</b> | <b>5.3 (2.8 – 10)</b>  |
| <b>Author characteristics</b>             | <b>Crude OR</b>        | <b>Adjusted OR *</b>   |
| Gender (female vs male, n = 827)          | 1.4 (1.0 – 1.9)        | <b>2.1 (1.4 – 3.1)</b> |
| Continent (ref: Europe)                   |                        |                        |
| North-America                             | <b>1.6 (1.2 – 2.1)</b> | 1.0 (0.7 – 1.4)        |
| Asia / Australia                          | <b>0.2 (0.0 – 0.9)</b> | 0.2 (0.0 – 1.1)        |
| Type of Affiliation (ref: university)     |                        |                        |
| government                                | 1.1 (0.8 – 1.6)        | 1.1 (0.7 – 1.6)        |
| industry                                  | ****                   | ****                   |
| other                                     | 1.0 (0.7 – 1.4)        | 0.7 (0.5 – 1.2)        |
| <b>Citation characteristics</b>           | <b>Crude OR</b>        | <b>Adjusted OR *</b>   |
| Self-Citation (yes vs no) *****           | 2.7 (1.0 – 7.3)        | 2.3 (0.8 – 6.7)        |
| Authority (ref: low)                      |                        |                        |
| medium                                    | <b>6.0 (3.7 – 9.8)</b> | <b>5.5 (3.4 – 9.0)</b> |
| high                                      | <b>10 (6.2 – 17)</b>   | <b>7.0 (4.1 – 12)</b>  |

These analyses are performed on the subnetwork of *cited* empirical publications and *citing* reviews, in order to check whether empirical evidence is selectively being picked up by reviews. Results should be interpreted tentatively, as the results are based on a relatively low number of citation paths. \* adjusted for Study Design, Log Sample Size, Type of Diesel Exhaust Exposure, Type of Exposure Assessment, and Smoking Adjustment. \*\* adjusted for Type of Diesel Exhaust Exposure, Type of Exposure Assessment, and Smoking Adjustment. \*\*\* not adjusted for itself. \*\*\*\* fewer than 5 publications per determinant level. \*\*\*\*\* analysed with a fixed-effects logistic regression. **supportive study conclusion:** authors' conclusion is supportive for harmful association between diesel exposure and lung cancer. **non-supportive study conclusion:** authors conclude there is no association or that association is unclear. vs: versus. N: number of publications. n: number of potential citation paths. Statistically significant odds ratios are reported in bold.

**Table S4. Sensitivity analyses on odds ratios (95% confidence intervals) for the likelihood to be cited, without the four most cited publications.**

| <u>Publication Characteristics</u>                         | <u>Complete Network</u> |                        | <u>Subnetwork of Cited Empirical Publications</u> |                        |                        |
|------------------------------------------------------------|-------------------------|------------------------|---------------------------------------------------|------------------------|------------------------|
| study outcome                                              | n                       | crude OR               | n                                                 | crude OR               | adjusted OR *          |
| Study Conclusion (supportive vs non-supportive)            | 3439                    | <b>1.3 (1.1 – 1.6)</b> | 2716                                              | <b>1.5 (1.2 – 1.9)</b> | 1.1 (0.8 – 1.5)        |
| <hr/>                                                      |                         |                        |                                                   |                        |                        |
| <u>Publication Characteristics</u>                         | <u>Complete Network</u> |                        | <u>Subnetwork of Cited Empirical Publications</u> |                        |                        |
| methodological quality indicators                          | n                       | crude OR               | n                                                 | crude OR               | adjusted OR            |
| Publication Type (empirical vs review)                     | 4017                    | <b>2.0 (1.5 – 2.7)</b> |                                                   |                        |                        |
| Study Design (ref: case-control) **                        | 4017                    |                        | 3268                                              |                        |                        |
| cohort                                                     |                         | <b>0.8 (0.6 – 1.0)</b> |                                                   | <b>0.8 (0.6 – 1.0)</b> | 0.9 (0.6 – 1.2)        |
| narrative review                                           |                         | <b>0.4 (0.3 – 0.6)</b> |                                                   |                        |                        |
| systematic review                                          |                         | 0.7 (0.2 – 2.4)        |                                                   |                        |                        |
| Sample Size (ref: low) ***                                 |                         |                        | 3268                                              |                        |                        |
| medium                                                     |                         |                        |                                                   | <b>1.4 (1.1 – 1.9)</b> | <b>2.0 (1.5 – 2.7)</b> |
| high                                                       |                         |                        |                                                   | <b>1.9 (1.4 – 2.4)</b> | <b>2.8 (2.0 – 4.0)</b> |
| Type of Diesel Exhaust Exposure (mix vs traditional) ***   |                         |                        | 3268                                              | <b>2.1 (1.6 – 2.8)</b> | <b>1.6 (1.2 – 2.1)</b> |
| Type of Exposure Assessment *** (JEM vs job/self-reported) |                         |                        | 3268                                              | <b>3.1 (2.5 – 3.9)</b> | <b>3.0 (2.4 – 3.8)</b> |
| Smoking Adjustment (yes vs no) ***                         |                         |                        | 3268                                              | <b>1.3 (1.1 – 1.7)</b> | 1.1 (0.8 – 1.4)        |
| <hr/>                                                      |                         |                        |                                                   |                        |                        |
| <u>Publication Characteristics</u>                         | <u>Complete Network</u> |                        | <u>Subnetwork of Cited Empirical Publications</u> |                        |                        |
| other                                                      | n                       | crude OR               | n                                                 | crude OR               | adjusted OR *          |
| Conclusive Title (yes vs no)                               | 4017                    | 0.7 (0.5 – 1.1)        | 3268                                              | ****                   | ****                   |
| Specificity (ref: very low)                                | 4017                    |                        | 3268                                              |                        |                        |
| low                                                        |                         | <b>2.0 (1.4 – 3.0)</b> |                                                   | <b>2.2 (1.5 – 3.3)</b> | <b>2.2 (1.4 – 3.3)</b> |
| high                                                       |                         | <b>6.4 (4.4 – 9.2)</b> |                                                   | <b>8.9 (6.0 – 13)</b>  | <b>7.5 (4.8 – 12)</b>  |
| very high                                                  |                         | <b>7.4 (5.0 – 11)</b>  |                                                   | <b>9.5 (6.3 – 14)</b>  | <b>8.9 (5.5 – 15)</b>  |
| Funding Source (ref: exclusively non-profit)               | 4017                    |                        | 3268                                              |                        |                        |
| for-profit                                                 |                         | 1.3 (1.0 – 1.7)        |                                                   | 1.3 (1.0 – 1.8)        | 1.1 (0.8 – 1.6)        |
| not reported                                               |                         | <b>0.4 (0.4 – 0.6)</b> |                                                   | <b>0.5 (0.4 – 0.6)</b> | <b>0.5 (0.4 – 0.7)</b> |

|                                 |      |                        |      |                                               |
|---------------------------------|------|------------------------|------|-----------------------------------------------|
| Number of Authors (ref: 1-2)    | 4017 |                        | 3268 |                                               |
| 3 - 5                           |      | <b>2.1 (1.7 – 2.8)</b> |      | <b>2.1 (1.5 – 2.8)</b> <b>1.5 (1.0 – 2.0)</b> |
| >= 6                            |      | <b>2.7 (2.0 – 3.5)</b> |      | <b>2.6 (1.9 – 3.6)</b> <b>1.4 (1.0 – 2.1)</b> |
| Number of Affiliations (ref: 1) | 4017 |                        | 3268 |                                               |
| 2                               |      | <b>1.5 (1.2 – 2.0)</b> |      | <b>2.2 (1.7 – 3.0)</b> <b>2.3 (1.7 – 3.2)</b> |
| >= 3                            |      | <b>2.8 (2.2 – 3.7)</b> |      | <b>3.6 (2.7 – 4.7)</b> <b>1.8 (1.3 – 2.6)</b> |
| Number of References (ref: <30) | 4017 |                        | 3268 |                                               |
| 30 - 50                         |      | 1.2 (0.9 – 1.5)        |      | 1.3 (1.0 – 1.7) <b>1.4 (1.1 – 1.9)</b>        |
| >= 50                           |      | 1.3 (1.0 – 1.6)        |      | <b>1.5 (1.1 – 2.0)</b> <b>1.5 (1.1 – 2.0)</b> |

| <u>Journal Characteristics</u>   | <u>Complete Network</u> |                        | <u>Subnetwork of Cited Empirical Publications</u> |                        |                        |
|----------------------------------|-------------------------|------------------------|---------------------------------------------------|------------------------|------------------------|
|                                  | n                       | crude OR               | n                                                 | crude OR               | adjusted OR *          |
| Journal Impact Factor (ref: 0-2) | 2066                    |                        | 1649                                              |                        |                        |
| 2 – 4                            |                         | <b>2.8 (2.0 – 3.8)</b> |                                                   | <b>2.5 (1.7 – 3.5)</b> | <b>2.4 (1.6 – 3.7)</b> |
| >= 4                             |                         | <b>3.8 (2.7 – 5.3)</b> |                                                   | <b>4.3 (3.0 – 6.1)</b> | <b>3.7 (2.5 – 5.6)</b> |

| <u>Author Characteristics</u>         | <u>Complete Network</u> |                        | <u>Subnetwork of Cited Empirical Publications</u> |                        |                        |
|---------------------------------------|-------------------------|------------------------|---------------------------------------------------|------------------------|------------------------|
|                                       | n                       | crude OR               | n                                                 | crude OR               | adjusted OR *          |
| Gender (female vs male)               | 3687                    | <b>1.5 (1.2 – 1.9)</b> | 3008                                              | <b>1.3 (1.0 – 1.6)</b> | <b>1.7 (1.3 – 2.2)</b> |
| Continent (ref: Europe)               | 4017                    |                        | 3268                                              |                        |                        |
| North-America                         |                         | <b>1.2 (1.0 – 1.5)</b> |                                                   | <b>1.4 (1.1 – 1.7)</b> | 0.8 (0.7 – 1.1)        |
| Asia / Australia                      |                         | <b>0.3 (0.1 – 0.8)</b> |                                                   | <b>0.1 (0.0 – 0.6)</b> | <b>0.1 (0.0 – 0.5)</b> |
| Type of Affiliation (ref: university) | 4017                    |                        | 3268                                              |                        |                        |
| government                            |                         | <b>1.5 (1.1 – 1.9)</b> |                                                   | 1.3 (0.9 – 1.5)        | 1.2 (0.9 – 1.7)        |
| industry                              |                         | 1.0 (0.7 – 1.5)        |                                                   | ****                   | ****                   |
| other                                 |                         | 1.1 (0.8 – 1.4)        |                                                   | 1.1 (0.8 – 1.4)        | 0.8 (0.6 – 1.1)        |

| <u>Citation Characteristics</u> | <u>Complete Network</u> |                        | <u>Subnetwork of Cited Empirical Publications</u> |                        |                        |
|---------------------------------|-------------------------|------------------------|---------------------------------------------------|------------------------|------------------------|
|                                 | n                       | crude OR               | n                                                 | crude OR               | adjusted OR *          |
| Self-Citation (yes vs no) ***** | 4017                    | <b>4.3 (3.1 – 6.2)</b> | 3268                                              | <b>3.9 (2.7 – 5.6)</b> | <b>2.6 (1.8 – 3.9)</b> |
| Authority (ref: low)            | 4017                    |                        | 3268                                              |                        |                        |
| medium                          |                         | <b>2.3 (1.8 – 3.1)</b> |                                                   | <b>3.3 (2.4 – 4.6)</b> | <b>3.0 (2.2 – 4.2)</b> |
| high                            |                         | <b>4.6 (3.4 – 6.1)</b> |                                                   | <b>5.8 (4.2 – 8.1)</b> | <b>3.6 (2.5 – 5.2)</b> |

**NOTE.** Analyses are performed on the complete network but without publications ranked 1 to 4 in Table S1.

\* adjusted for Study Design, Log Sample Size, Type of Diesel Exhaust Exposure, Type of Exposure Assessment, and Smoking Adjustment.

\*\* adjusted for Type of Diesel Exhaust Exposure, Type of Exposure Assessment, and Smoking Adjustment. \*\*\* not adjusted for itself.

\*\*\*\* fewer than 5 publications per determinant level. \*\*\*\*\* analysed with a fixed-effects logistic regression. **supportive study**

**conclusion:** authors' conclusion is supportive for harmful association between diesel exposure and lung cancer. **non-supportive study**

**conclusion:** authors conclude there is no association or that association is unclear. vs: versus. N: number of publications. n: number of

potential citation paths. Reviews were included in the subnetwork, but only as citing publications. Statistically significant odds ratios are reported in bold.

**Table S5. Explorative analysis on the association between source of funding and methodological quality indicators for empirical publications.**

| <b>Quality indicator</b>                                | <b>Odds ratio<br/>(95% confidence interval)</b> |
|---------------------------------------------------------|-------------------------------------------------|
| Study design (cohort vs. cross-sectional)               | 0.9 (0.2 – 3.4)                                 |
| Sample size (highest vs. lowest tertile)                | 0.6 (0.1 – 3.1)                                 |
| Type of exposure assessment (JEM vs. job/self-reported) | 9.4 (1.1 – 81)                                  |
| Type of diesel exhaust exposure (mix vs. traditional)   | 1.9 (0.5 – 7.7)                                 |
| Smoking adjustment (yes vs. no)                         | 0.4 (0.1 – 1.6)                                 |

**NOTE.** Odds ratios are based on fixed-effects logistic regression of the quality indicators on source of funding. (So, the quality indicators serve as *dependent* variable and the source of funding as *independent* variable.) Odds ratios bigger than 1 signify a positive relationship between for-profit funding and higher quality.

**Table S6. Sensitivity analyses on the association between source of funding and study conclusion, adjusted for methodological quality indicators.**

| <b>Odds ratio<br/>adjusted for:</b> | <b>Odds ratio<br/>(95% confidence interval)</b> |
|-------------------------------------|-------------------------------------------------|
| (crude odds ratio)                  | 8.2 (1.9 – 36)                                  |
| Study design                        | 6.4 (1.4 – 30)                                  |
| Log sample size                     | 4.9 (1.0 – 24)                                  |
| Type of exposure assessment         | 17 (1.5 – 176)                                  |
| Type of diesel exhaust exposure     | 5.9 (1.1 – 31)                                  |
| Smoking adjustment                  | 4.8 (1.0 – 23)                                  |

**NOTE.** Due to the small sample it was not possible to adjust for all quality indicators simultaneously. Odds ratios are based on fixed-effects logistic regression of study conclusion on source of funding. Odds ratios bigger than 1 signify a positive relationship between for-profit funding and non-supportive study conclusion.

**Figure S1. Development of citation bias over time.**<sup>[L1]</sup><sub>[SEP]</sub>

The first publication in our network was published in 1988. So in 1999 the network was 11 years old, and 29 years old in 2017. This graph depicts how citation bias develops over time, by limiting the network to the publications that are published in each of the consecutive calendar years. Citation bias within this network is remarkably stable, with crude odds ratios oscillating mostly between 1.5 and 1.75. Adjusted odds ratios are adjusted for study design. The odds ratios relate to the odds of supportive publication being cited relative to the odds of non-supportive publications (with no or unclear association) being cited. Before 1999, regression analyses are unreliable (not enough data points).
